# Supplementary material for: Ionic liquid-derived nano-fibrillated mesoporous carbon based on solid-phase microextraction fiber for the analysis of volatile organic compounds from aqueous solutions
Source: Royal Society of Chemistry journal article supplement (doi:10.1039/c5nj00451a), 2015-01-01
Supplement: c5nj00451a1.pdf [file c5nj00451a1.pdf]

**Electronic Supplementary Information**

**New Journal of Chemistry**

**Ionic Liquid Derived Nano-Fibrillated Mesoporous Carbon based on solid-phase microextraction fiber for analysis of volatile organic compounds from aqueous solutions**

Mir Mahdi Abolghasemi<sup>1,\*</sup>, Babak Karimi<sup>2</sup>, Vahid Yousefi<sup>1</sup>, Hesam Behzadnia<sup>2</sup>, Hossein Barzegar<sup>2</sup>, Marzieh Piryaee<sup>3</sup>

<sup>1</sup> Department of Chemistry, Faculty of Science, Maragheh University, Maragheh, Iran

<sup>2</sup> Department of Chemistry Institute for Advanced Studies in Basic Sciences (IASBS) 45137-6731 (Iran)

<sup>3</sup> Research Center for Pharmaceutical Nanotechnology, Tabriz University of Medical Sciences, Tabriz, Iran

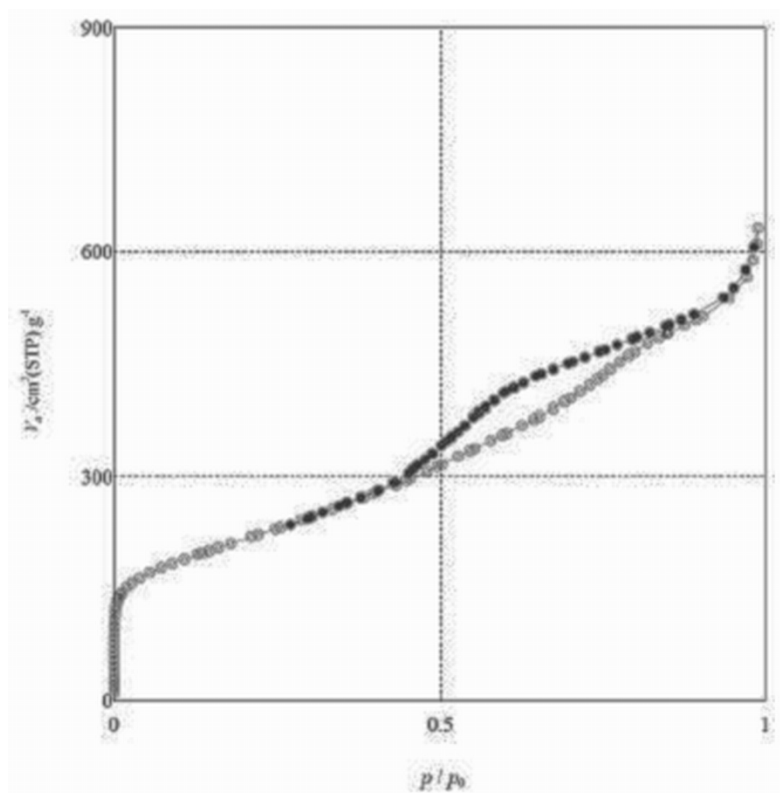

Figure S1. Nitrogen Adsorption-Desorption isotherm for IFMC

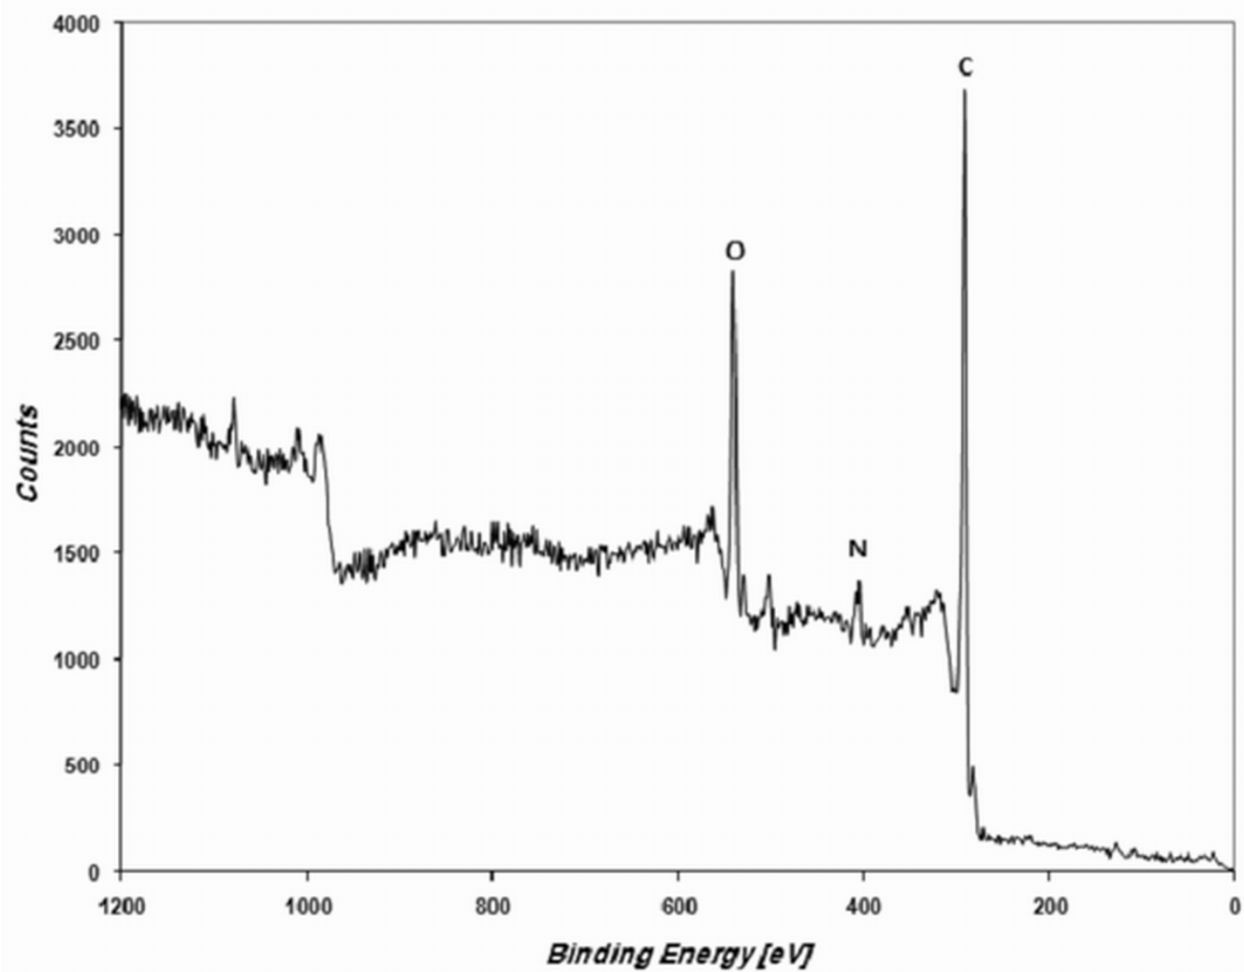

Figure S2. The XPS spectrums of the IFMC
